# Supplementary material for: Inequalities in infant mortality in Italy
Source: Ital J Pediatr. 2019 Jan 11;45:11. doi: 10.1186/s13052-018-0594-6 (PMC6330401; doi:10.1186/s13052-018-0594-6)
Supplement: Supplementary file 1 — Infant mortality additional file. (XLSX 20 kb) [file 13052_2018_594_MOESM1_ESM.xlsx]

## Sheet: table S1
Table S1. Post-neonatal mortality rates (PMR)
Year	Deaths			PMR (95%CI)
	Residents in Italy	Italian residents	Resident immigrants	Residents	Italian residents	Immigrant residents	RR (Immigrants/Italians)
2006	531	447.043	83.9569	0.9 (0.9;1.0)	0.9 (0.8;1.0)	1.5 (1.2;1.8)	1.63289
2007	552	453.036	98.9641	1.0 (0.9;1.1)	0.9 (0.8;1.0)	1.5 (1.3;1.9)	1.70491
2008	546	432.432	113.568	0.9 (0.9;1.0)	0.9 (0.8;0.9)	1.6 (1.3;1.9)	1.82709
2009	536	406.43	129.57	0.9 (0.9;1.0)	0.8 (0.7;0.9)	1.7 (1.4;2.0)	2.03309
2010	503	394.746	108.254	0.9 (0.8;1.0)	0.8 (0.7;0.9)	1.4 (1.1;1.7)	1.69941
2011	489	372.571	116.429	0.9 (0.8;1.0)	0.8 (0.7;0.9)	1.5 (1.2;1.8)	1.8476
2012	455	335.086	119.914	0.9 (0.8;0.9)	0.7 (0.7;0.8)	1.5 (1.2;1.8)	2.03486
2013	411	314.294	96.7059	0.8 (0.7;0.9)	0.7 (0.6;0.8)	1.2 (1.0;1.5)	1.72884
2014	400	306.286	93.7143	0.8 (0.7;0.9)	0.7 (0.6;0.8)	1.2 (1.0;1.5)	1.74259
2015	447	338.742	108.258	0.9 (0.8;1.0)	0.8 (0.7;0.9)	1.5 (1.2;1.8)	1.83378

## Sheet: table S2
Table S2. Specific causes of PMR : Italians vs immigrants. 2013-2015
	PMR (95% CI)
	Italians	Immigrants	RR
Disorders related to length of gestation and fetal growth	0.008 (0.004;0.015)	0.006 (0.000;0.027)	0.7
Other perinatal diseases	0.035 (0.025;0.046)	0.035 (0.015;0.070)	1
Other diseases	0.006 (0.003;0.012)	0.000 (0.000;0.016)	0
Other congenital malformations	0.013 (0.008;0.022)	0.026 (0.009;0.057)	1.9
Other respiratory conditions originating in the perinatal period	0.031 (0.022;0.042)	0.068 (0.039;0.112)	2.2
Symptoms, signs and abnormal clinical and laboratory findings, not elsewhere classified	0.039 (0.029;0.051)	0.065 (0.036;0.108)	1.7
External causes of morbidity and mortality	0.020 (0.013;0.030)	0.046 (0.022;0.083)	2.3
Hemorrhagic and hematological disorders of the fetus and the newborn	0.004 (0.002;0.010)	0.015 (0.003;0.041)	3.4
Specific infections of the perinatal period	0.018 (0.011;0.027)	0.013 (0.003;0.039)	0.7
Hypoxia and intra-uterine asphyxia or birth	0.017 (0.011;0.026)	0.024 (0.008;0.054)	1.4
Diseases of the circulatory system	0.072 (0.058;0.088)	0.126 (0.084;0.182)	1.8
Diseases of the respiratory system	0.040 (0.030;0.053)	0.073 (0.042;0.118)	1.8
Congenital malformations of the circulatory system	0.134 (0.114;0.155)	0.258 (0.196;0.334)	1.9
Congenital malformations of the nervous system	0.020 (0.013;0.030)	0.068 (0.038;0.111)	3.4
Infant with maternal factors and complications of pregnancy, labor and delivery	0.007 (0.003;0.013)	0.015 (0.003;0.041)	2.1
Respiratory distress of the newborn	0.010 (0.006;0.018)	0.070 (0.040;0.114)	6.7
Certain infectious and parasitic diseases	0.048 (0.037;0.062)	0.052 (0.026;0.091)	1.1
Chromosomal abnormalities, not classified elsewhere	0.035 (0.026;0.047)	0.057 (0.030;0.098)	1.6
Diseases of blood and hematopoietic organs and some disorders of the immune system	0.009 (0.004;0.016)	0.017 (0.004;0.044)	1.9
Diseases of the nervous system and sensory organs	0.059 (0.047;0.074)	0.067 (0.037;0.110)	1.1
Diseases of the digestive system	0.029 (0.020;0.040)	0.046 (0.023;0.084)	1.6
Endocrine, nutritional and metabolic diseases	0.019 (0.012;0.028)	0.067 (0.038;0.111)	3.6
Congenital malformations of the digestive system	0.008 (0.004;0.015)	0.019 (0.005;0.047)	2.3
Congenital malformations of the genitourinary system	0.002 (0.000;0.006)	0.000 (0.000;0.016)	0
Congenital malformations of the respiratory system	0.005 (0.002;0.011)	0.005 (0.000;0.026)	0.9
Congenital malformations and deformations of the skeletal-muscular apparatus, imbs and tegument	0.015 (0.009;0.023)	0.021 (0.007;0.051)	1.4
Sudden death syndrome in childhood	0.028 (0.019;0.039)	0.046 (0.023;0.084)	1.7
Neoplasms	0.018 (0.011;0.027)	0.027 (0.010;0.058)	1.5

## Sheet: table S3
IMR according geographical areas
	2006	2007	2008	2009	2010	2011	2012	2013	2014	2015
Nord West	2.8 (2.6;3.1)	2.9 (2.7;3.2)	2.7 (2.5;3.0)	2.9 (2.6;3.2)	2.6 (2.4;2.9)	2.6 (2.4;2.9)	2.4 (2.2;2.7)	2.4 (2.2;2.7)	2.5 (2.3;2.8)	2.6 (2.3;2.9)
Nord East	3.0 (2.6;3.3)	2.7 (2.4;3.0)	2.9 (2.6;3.2)	2.9 (2.6;3.2)	2.6 (2.3;2.9)	3.0 (2.6;3.3)	2.7 (2.4;3.0)	2.6 (2.3;2.9)	2.4 (2.1;2.7)	2.4 (2.1;2.7)
Center	3.4 (3.1;3.8)	3.1 (2.7;3.4)	3.1 (2.8;3.4)	3.3 (3.0;3.7)	2.9 (2.6;3.2)	2.7 (2.4;3.1)	2.6 (2.3;2.9)	2.6 (2.3;3.0)	2.4 (2.1;2.7)	2.9 (2.5;3.2)
South	4.2 (3.9;4.6)	4.0 (3.7;4.4)	4.0 (3.7;4.4)	4.1 (3.7;4.4)	3.8 (3.5;4.2)	3.6 (3.3;4.0)	3.9 (3.6;4.3)	3.7 (3.3;4.0)	3.2 (2.9;3.6)	3.3 (3.0;3.7)
Islands	3.8 (3.4;4.4)	4.0 (3.5;4.6)	4.1 (3.7;4.7)	4.5 (4.0;5.1)	4.4 (3.0.9;5)	4.0 (3.5;4.5)	3.8 (3.3;4.3)	4.0 (3.5;4.5)	3.7 (3.2;4.3)	3.6 (3.2;4.2)
Italy	3.4 (3.3;3.6)	3.3 (3.1;3.4)	3.3 (3.1;3.4)	3.4 (3.3;3.6)	3.2 (3.0;3.3)	3.1 (2.9;3.2)	3.0 (2.9;3.2)	3.0 (2.8;3.1)	2.8 (2.6;2.9)	2.9 (2.7;3.1)

## Sheet: table S4
NMR according geographical areas
	2006	2007	2008	2009	2010	2011	2012	2013	2014	2015
North West	2.1(1.9;2.3)	2.1(1.8;2.3)	2.0(1.8;2.2)	2.1(1.8;2.3)	1.9(1.7;2.1)	1.9(1.7;2.1)	1.7(1.5;2.0)	1.7(1.5;1.9)	1.7(1.5;2.0)	1.8(1.6;2.0)
North East	2.2(1.9;2.5)	2.0(1.8;2.3)	2.0(1.7;2.2)	2.1(1.9;2.4)	1.9(1.7;2.2)	1.9(1.7;2.2)	1.8(1.6;2.1)	1.8(1.6;2.1)	1.7(1.4;2.0)	1.5(1.3;1.8)
Center	2.5(2.2;2.8)	2.1(1.8;2.4)	2.2(1.9;2.5)	2.3(2.0;2.6)	2.1(1.8;2.3)	2.1(1.8;2.3)	1.9(1.6;2.2)	2.0(1.8;2.3)	1.7(1.5;2.0)	2.0(1.7;2.3)
South	3.0(2.7;3.3)	2.7(2.5;3.0)	2.9(2.6;3.2)	3.0(2.7;3.3)	2.7(2.5;3.0)	2.6(2.3;2.9)	2.8(2.5;3.1)	2.7(2.4;3.0)	2.4(2.1;2.7)	2.3(2.0;2.6)
Islands	2.7(2.3;3.1)	2.9(2.5;3.4)	3.0(2.6;3.4)	3.4(3.0;3.9)	3.2(2.7;3.6)	2.8(2.4;3.2)	2.9(2.5;3.4)	3.0(2.5;3.5)	2.6(2.2;3.1)	2.5(2.1;3.0)
Italy	2.5(2.3;2.6)	2.3(2.2;2.4)	2.3(2.2;2.5)	2.5(2.4;2.6)	2.3(2.1;2.4)	2.2(2.1;2.3)	2.2(2;2.3)	2.2(2;2.3)	2.0(1.9;2.1)	2.0(1.9;2.1)

## Sheet: table S5
Italian residents IMR according geographical areas
	2006	2007	2008	2009	2010	2011	2012	2013	2014	2015
North West	2.6(2.3;2.9)	2.5(2.2;2.8)	2.5(2.2;2.8)	2.4(2.1;2.7)	2.3(2.0;2.6)	2.4(2.1;2.7)	2.1(1.8;2.4)	2.1(1.9;2.4)	2.2(2.0;2.5)	2.1(1.9;2.4)
North East	2.7(2.3;3.0)	2.3(2.0;2.7)	2.6(2.3;2.9)	2.4(2.1;2.7)	2.4(2.1;2.8)	2.6(2.2;2.9)	2.3(2.0;2.7)	2.2(1.9;2.6)	2.0(1.7;2.3)	2.0(1.7;2.4)
Center	3.1(2.8;3.5)	2.8(2.5;3.2)	2.7(2.4;3.1)	2.9(2.6;3.3)	2.4(2.1;2.8)	2.2(1.9;2.6)	2.3(2.0;2.6)	2.3(1.9;2.6)	2.2(1.9;2.6)	2.2(1.9;2.5)
South	4.1(3.8;4.5)	4.0(3.6;4.3)	3.9(3.5;4.2)	3.9(3.6;4.2)	3.7(3.4;4.1)	3.6(3.2;3.9)	3.8(3.5;4.2)	3.5(3.2;3.9)	3.2(2.8;3.5)	3.3(3.0;3.7)
Islands	3.7(3.3;4.3)	4.0(3.5;4.5)	4.1(3.6;4.6)	4.4(3.9;4.9)	4.4(3.9;4.9)	3.9(3.4;4.4)	3.6(3.1;4.2)	3.9(3.4;4.4)	3.5(3.0;4.1)	3.6(3.1;4.2)
Italy	3.2(3.1;3.4)	3.1(3;3.3)	3.1(3;3.3)	3.1(3;3.3)	3.0(2.8;3.2)	2.9(2.7;3.1)	2.8(2.7;3)	2.8(2.6;2.9)	2.6(2.4;2.7)	2.6(2.5;2.8)

## Sheet: table S6
Immigrant residents IMR according geographical areas
	2006	2007	2008	2009	2010	2011	2012	2013	2014	2015
North West	4.0(3.5;5.2)	5.0(4.2;6.0)	4.0(3.1;4.5)	5.0(4.0;5.5)	4.0(3.2;4.6)	4.0(3.0;4.4)	4.0(3.2;4.6)	4.0(2.9;4.3)	4.0(3.0;4.4)	4.0(3.4;5)
North East	4.5(3.6;5.6)	4.1(3.3;5.2)	4.2(3.4;5.2)	4.9(4.0;5.9)	3.3(2.6;4.1)	4.3(3.5;5.3)	3.9(3.2;4.8)	3.9(3.1;4.8)	3.9(3.1;4.9)	3.9(3.0;4.8)
Center	5.8(4.6;7.3)	4.5(3.5;5.8)	5.2(4.1;6.4)	5.6(4.5;6.8)	5.3(4.3;6.5)	5.3(4.3;6.5)	3.9(3.1;5.0)	4.3(3.4;5.4)	3.2(2.4;4.2)	6.3(5.1;7.6)
South	8.4(5.6;12.2)	5.6(3.5;8.5)	8.5(6.0;11.6)	8.6(6.2;11.6)	6.3(4.3;8.9)	4.6(3.0;6.7)	5.5(3.8;7.7)	6.4(4.6;8.7)	4.4(2.9;6.4)	3.3(2.0;5.0)
Islands	7.9(4.1;13.9)	5.7(2.8;10.4)	6.4(3.5;10.9)	8.3(4.9;13.1)	5.7(3.1;9.6)	6.1(3.4;9.9)	7.6(4.7;11.8)	6.2(3.5;10.2)	8.1(5.0;12.3)	4.5(2.3;7.8)
Italy	5.0(4.4;5.6)	4.7(4.2;5.3)	4.6(4.1;5.1)	5.3(4.8;5.8)	4.2(3.8;4.7)	4.4(3.9;4.8)	4.1(3.7;4.6)	4.1(3.7;4.6)	3.8(3.4;4.3)	4.5(4.0;5.0)
